# Supplementary material for: Biomedical consequences of elevated cholesterol-containing lipoproteins and apolipoproteins on cardiovascular and non-cardiovascular outcomes
Source: PubMed Central journal article supplement (PMC9859819; doi:10.1038/s43856-022-00234-0), 2023-01-20
Supplement: 43856_2022_234_MOESM1_ESM.pdf [file 43856_2022_234_MOESM1_ESM.pdf]

## Description of Additional Supplementary Files

**Filename:** SupplementaryData1.tsv

**Description:** (Multivariable) Mendelian randomization effect estimates for one standard deviation change in LDL-C

**Filename:** SupplementaryData2.tsv

**Description:** (Multivariable) Mendelian randomization effect estimates for one standard deviation change in HDL-C

**Filename:** SupplementaryData3.tsv

**Description:** (Multivariable) Mendelian randomization effect estimates for one standard deviation change in TG

**Filename:** SupplementaryData4.tsv

**Description:** (Multivariable) Mendelian randomization effect estimates for one standard deviation change in VLDL-C

**Filename:** SupplementaryData5.tsv

**Description:** (Multivariable) Mendelian randomization effect estimates for one standard deviation change in IDL-C

**Filename:** SupplementaryData6.tsv

**Description:** (Multivariable) Mendelian randomization effect estimates for one standard deviation change in Rem-cho

**Filename:** SupplementaryData7.tsv

**Description:** (Multivariable) Mendelian randomization effect estimates for one standard deviation change in TC

**Filename:** SupplementaryData8.tsv

**Description:** (Multivariable) Mendelian randomization effect estimates for one standard deviation change in Apo-B

**Filename:** SupplementaryData9.tsv

**Description:** (Multivariable) Mendelian randomization effect estimates for one standard deviation change in Apo-A1

**Filename:** SupplementaryData10.tsv

**Description:** *cis* Mendelian randomization effect estimates for one standard deviation change in Apo-B

**Filename:** SupplementaryData11.tsv

**Description:** *cis* Mendelian randomization effect estimates for one standard deviation change in Apo-A1

**Filename:** SupplementaryData12.tsv

**Description:** Multivariable Mendelian randomization effect estimates for one standard deviation change in HDL-C, TG, or Apo-B

**Filename:** SupplementaryData13.tsv

**Description:** Overview of (previous) Mendelian randomization studies estimating the HDL-C effect on CHD

**Filename:** SupplementaryData14.tsv.gz

**Description:** The genetic instrument data used in the univariable (total effect) Mendelian randomization analysis

**Filename:** SupplementaryData15.tsv.gz

**Description:** The genetic instrument data used in the multivariable (direct effect) Mendelian randomization analysis

**Filename:** SupplementaryData16.md

**Description:** Readme for SupplementaryData14.tsv.gz and SupplementaryData15.tsv.gz
