# Supplementary material for: Biomedical consequences of elevated cholesterol-containing lipoproteins and apolipoproteins on cardiovascular and non-cardiovascular outcomes
Source: PubMed Central journal article supplement (PMC9859819; doi:10.1038/s43856-022-00234-0), 2023-01-20
Supplement: 43856_2022_234_MOESM2_ESM.pdf [file 43856_2022_234_MOESM2_ESM.pdf]

# **Biomedical consequences of elevated cholesterol-containing lipoproteins and apolipoproteins on cardiovascular and non-cardiovascular outcomes**

**Blood lipoproteins and apolipoprotein**

A F Schmidt *et. al.*

# Contents

|          |                              |           |
|----------|------------------------------|-----------|
| <b>1</b> | <b>Figures</b>               | <b>3</b>  |
| <b>2</b> | <b>Tables</b>                | <b>9</b>  |
| <b>3</b> | <b>Supplementary results</b> | <b>12</b> |
|          | <b>Bibliography</b>          | <b>14</b> |

# 1 Figures

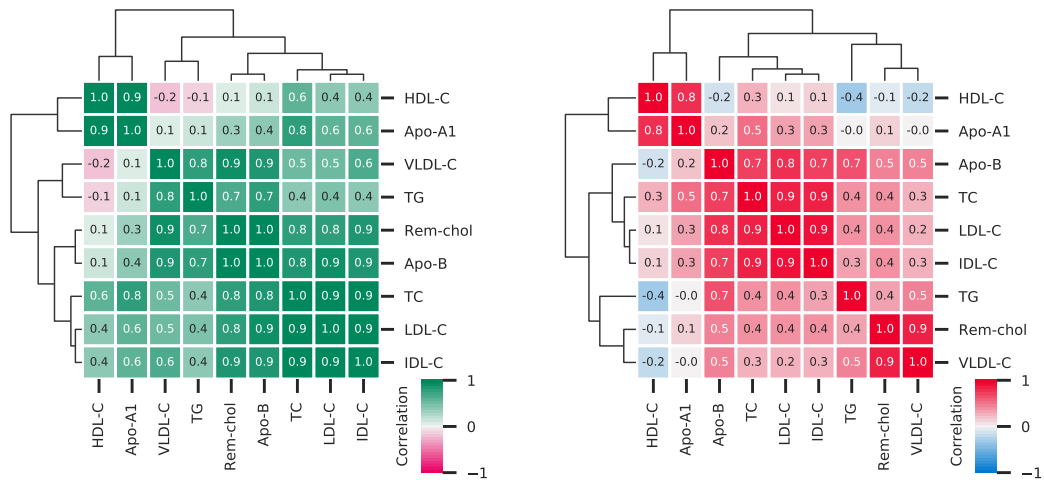

**Supplementary Figure 1:** Spearman's pairwise correlation between the phenotypic NMR measured blood lipids (*left*: based on a n=14,834 UCLEB[1] sample) and between the genetic association with these blood lipids (*right*: based on a n=33,029 meta-analysis of UCLEB and Kettunen[2]); the margin order was based on hierarchical clustering of the Euclidean distance.

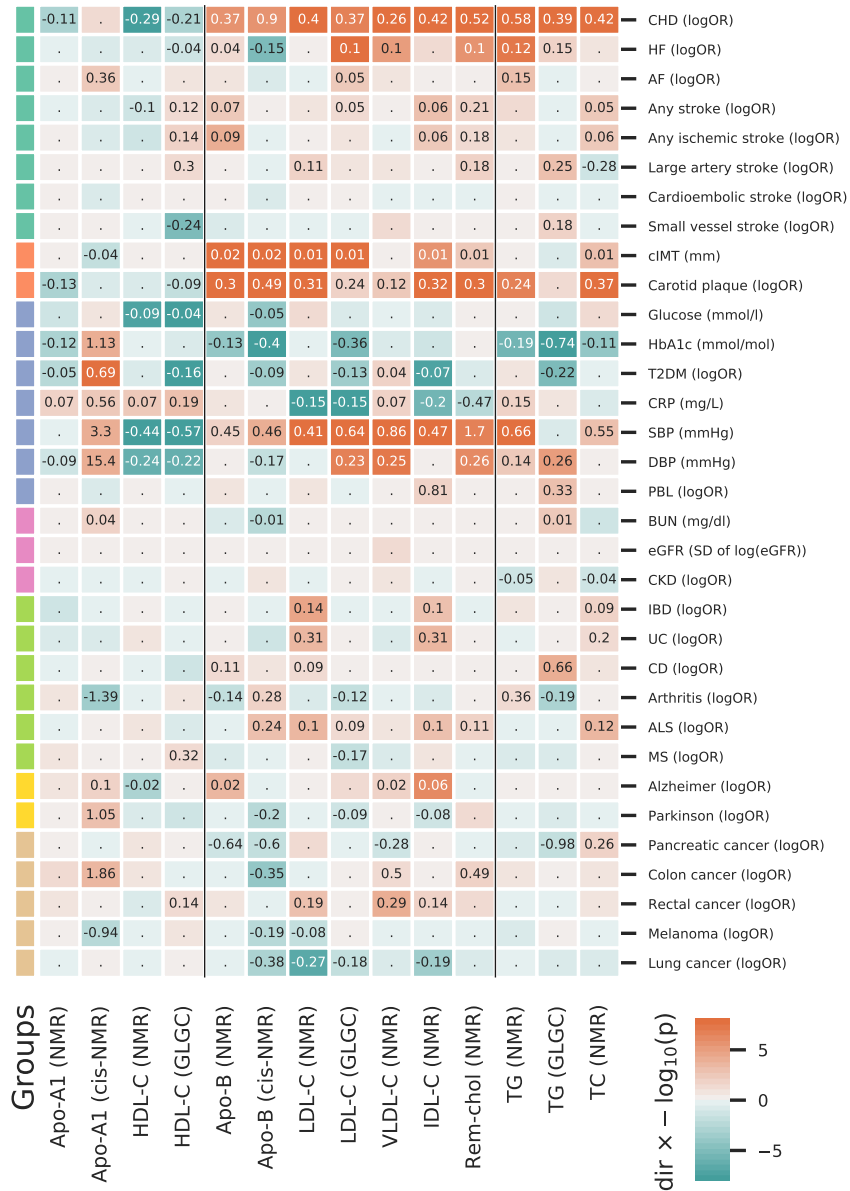

**Supplementary Figure 2:** Mendelian randomization estimates of the total effects of a one SD increase in cholesterol-containing lipoprotein and apolipoprotein concentration. With independent replication data from the GLGC GWAS [3], and technical replication using *cis* MR analysis of Apo-A1 and Apo-B concentrations.

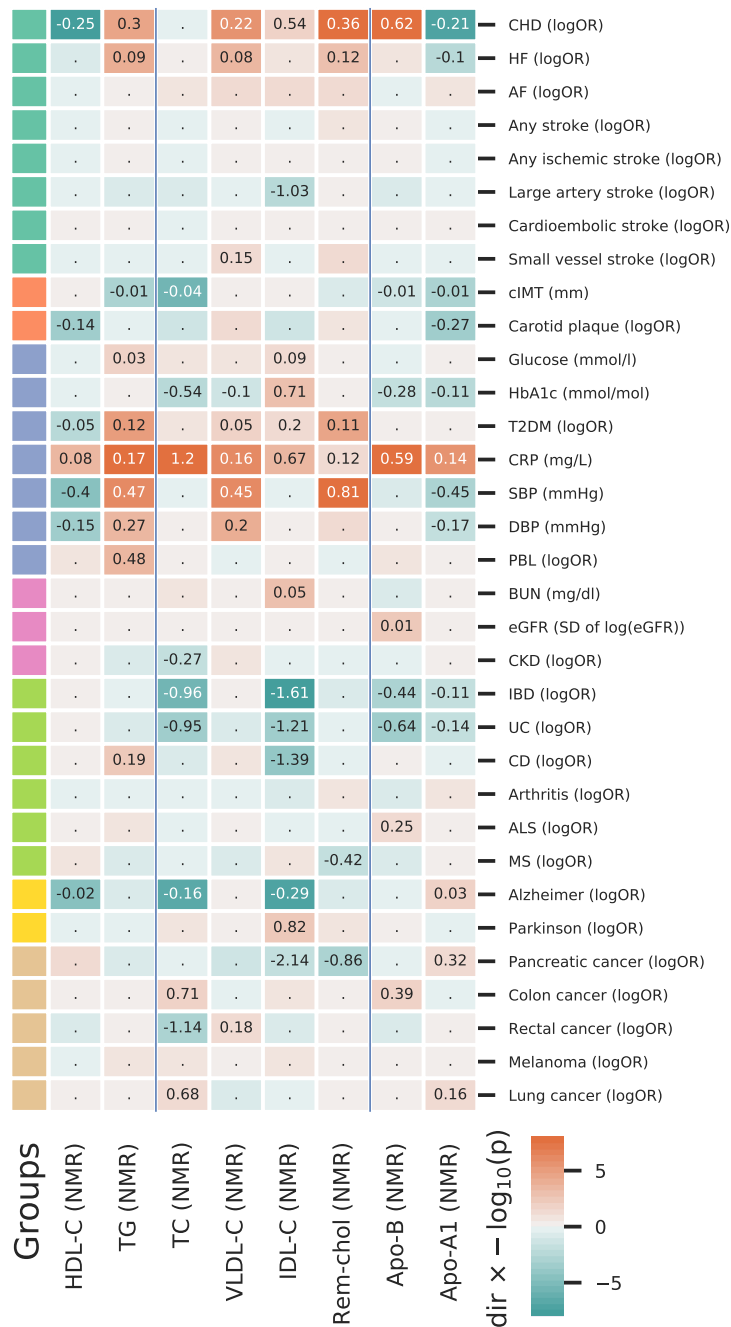

**Supplementary Figure 3:** Multivariable Mendelian randomization estimates of the direct pathway effect of one SD change in blood lipid, conditional on LDL-C.

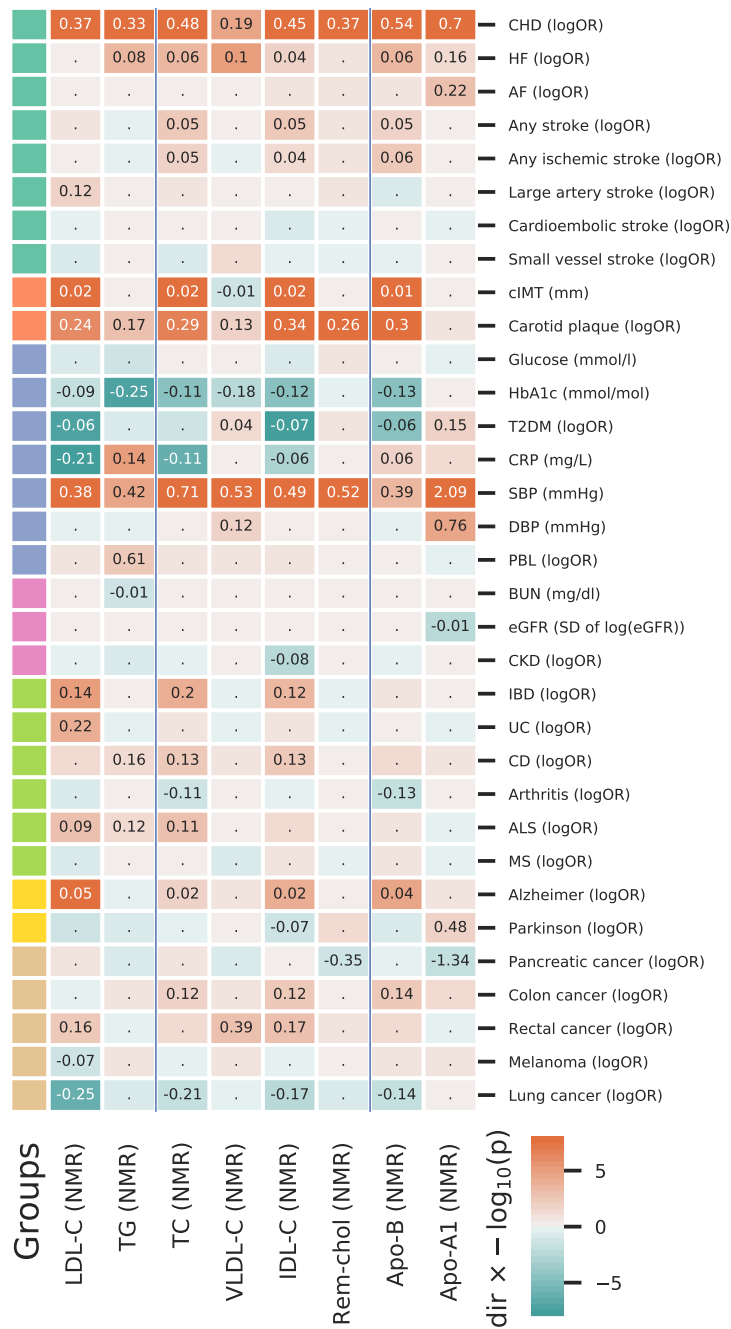

**Supplementary Figure 4:** Multivariable Mendelian randomization estimates of the direct pathway effect of one SD change in blood lipid, conditional on HDL-C.

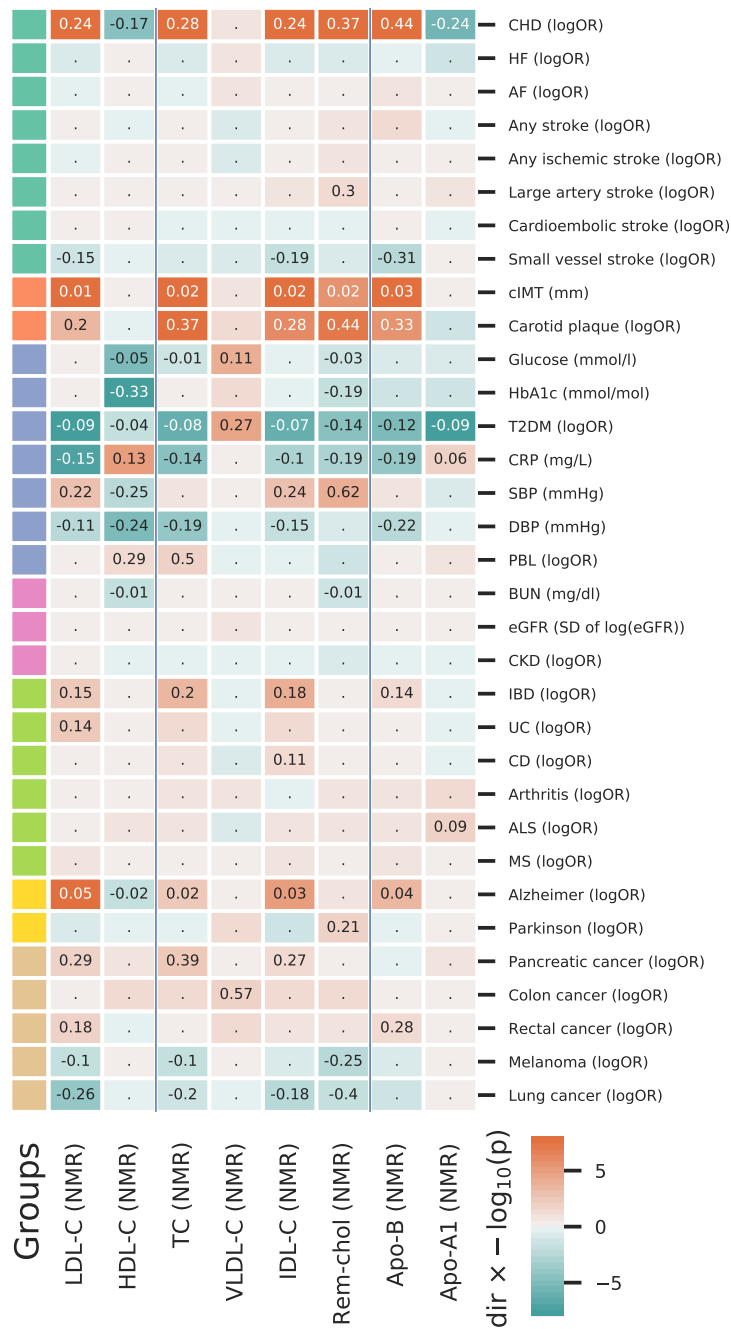

**Supplementary Figure 5:** Multivariable Mendelian randomization estimates of the direct pathway effect of one SD change in blood lipid, conditional on Triglycerides.

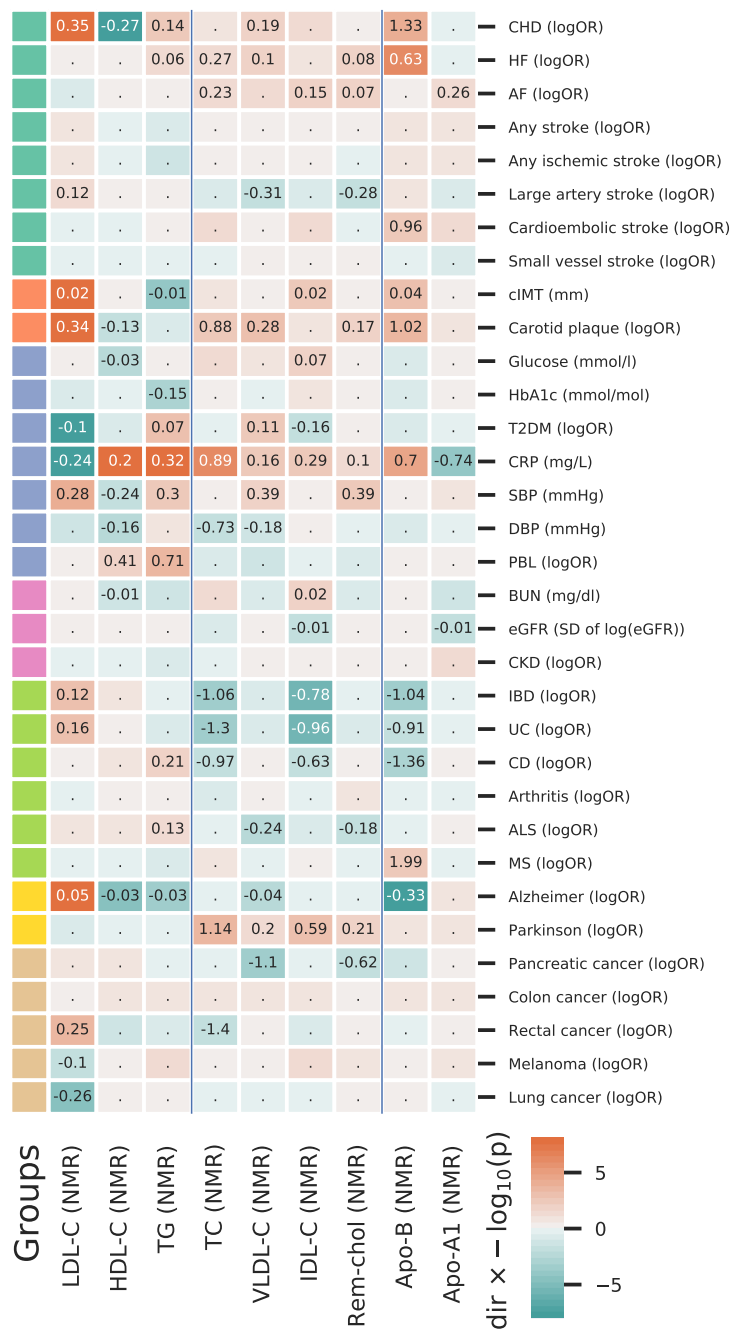

**Supplementary Figure 6:** Multivariable Mendelian randomization estimates of the direct pathway effect of one SD change in blood lipid, (fully) conditional on LDL-C, HDL-C, and Triglycerides.



## 2 Tables

### Supplementary Table 1: Mendelian randomization analysis synopsis.

---

#### Mendelian randomization steps

---

##### Filter variants on:

- F-statistic larger than 24,
- For *cis*-MR:
  - F-statistic larger than 15,
  - Within a 50 kbp upstream and downstream window around the gene,
- Minor allele frequency of at least 0.01,
- Pairwise r-squared less than 0.10.

##### (MV)MR modelling:

- Inverse variance weighted (IVW),
- MR-Egger,
- Corrected for residual LD using a UKB reference panel,
- Removal of variants with large leverage or heterogeneity statistics,
- Rucker framework, selecting the MR-Egger results if  $Q_{IVW} - Q_{Egger}$  is larger than 3.84.

##### Prioritization:

- For each exposure and outcome pair:
  - Determine the *total effect* using univariable MR,
  - Determine the *direct effects* conditioning on I) LDL-C, II) HDL-C, III) TG, and IV) LDL-C+HDL-C+TG using multivariable MVMR,
    - \* Skip duplicate exposure models, e.g., when LDL-C is the exposure of interest do not run an MVMR model including LDL-C twice.
  - An association between an exposure and outcome pair is considered *prioritized* when it is significant and directionally concordant in at least 60% of the combined univariable and multivariable models.

**Supplementary Table 2:** The standard deviation of NMR measured blood lipids in mmol/L (total cholesterol, triglycerides, lipoproteins) or g/L (apolipoproteins)

| <b>Blood lipid</b> | <b>Standard deviation</b> |
|--------------------|---------------------------|
| LDL-C              | 0.646                     |
| HDL-C              | 0.416                     |
| TG                 | 0.613                     |
| VLDL-C             | 0.282                     |
| IDL-C              | 0.232                     |
| Rem-chol           | 0.461                     |
| Chol               | 1.238                     |
| Apo-B              | 0.238                     |
| Apo-A1             | 0.276                     |

**Supplementary Table 3:** Conditional F-statistics for the considered multivariable Mendelian randomization models

| Exposure        | Median | Quantile: 0.15 | Quantile: 0.85 | Conditional model |
|-----------------|--------|----------------|----------------|-------------------|
| Apo-A1          | 15.75  | 15.62          | 16.05          | LDL-C             |
| HDL-C           | 18.36  | 17.84          | 19.28          | LDL-C             |
| Apo-B           | 11.02  | 9.11           | 11.54          | LDL-C             |
| VLDL-C          | 7.88   | 7.80           | 8.02           | LDL-C             |
| IDL-C           | 6.41   | 5.98           | 6.93           | LDL-C             |
| Rem-cholesterol | 6.15   | 6.05           | 6.46           | LDL-C             |
| TG              | 13.34  | 12.88          | 13.79          | LDL-C             |
| TC              | 14.17  | 12.57          | 14.82          | LDL-C             |
| Apo-A1          | 15.60  | 15.52          | 15.81          | HDL-C             |
| Apo-B           | 18.24  | 17.40          | 19.00          | HDL-C             |
| LDL-C           | 25.85  | 23.58          | 26.17          | HDL-C             |
| VLDL-C          | 7.49   | 7.45           | 7.60           | HDL-C             |
| IDL-C           | 24.86  | 24.20          | 25.51          | HDL-C             |
| Rem-cholesterol | 7.40   | 7.40           | 7.65           | HDL-C             |
| TG              | 12.27  | 11.90          | 13.42          | HDL-C             |
| TC              | 29.57  | 28.92          | 29.95          | HDL-C             |
| Apo-A1          | 16.45  | 16.26          | 16.78          | TG                |
| HDL-C           | 14.54  | 14.37          | 14.86          | TG                |
| Apo-B           | 18.11  | 16.85          | 19.30          | TG                |
| LDL-C           | 19.85  | 16.94          | 20.80          | TG                |
| VLDL-C          | 3.13   | 3.07           | 3.13           | TG                |
| IDL-C           | 18.96  | 16.92          | 19.54          | TG                |
| Rem-cholesterol | 6.61   | 6.58           | 6.75           | TG                |
| TC              | 18.12  | 16.67          | 18.64          | TG                |
| Apo-A1          | 3.16   | 3.01           | 3.24           | LDL-C, HDL-C & TG |
| HDL-C           | 11.11  | 10.94          | 11.31          | LDL-C & TG        |
| Apo-B           | 2.65   | 2.61           | 2.75           | LDL-C, HDL-C & TG |
| LDL-C           | 16.71  | 14.95          | 17.83          | HDL-C & TG        |
| VLDL-C          | 2.74   | 2.72           | 2.83           | LDL-C, HDL-C & TG |
| IDL-C           | 5.49   | 5.42           | 5.74           | LDL-C, HDL-C & TG |
| Rem-cholesterol | 3.15   | 3.13           | 3.29           | LDL-C, HDL-C & TG |
| TG              | 8.61   | 8.46           | 9.37           | LDL-C & HDL-C     |
| TC              | 2.81   | 2.79           | 2.93           | LDL-C, HDL-C & TG |

## 3 Supplementary results

### NMR GWAS participants characteristics

Genetic instruments for cholesterol-containing lipoprotein and apolipoprotein concentrations were sourced from a meta-analysis of Kettunen *et al*, and the UCLEB consortium. The former included data from Finnish, Estonian, Dutch and German cohorts, with a median age of 46.9 years, median BMI of 26.35 kg/m<sup>2</sup> and 54% women enrolled, see [2]. UCLEB consisted of UK-based cohorts with a mean age of 58.6 years, mean BMI of 26.4 kg/m<sup>2</sup>, and 44% women included [1]. Please see the source publications (referenced in the main manuscript) for the subject characteristics of the GWAS outcome data.

### Validation of the LDL-C, HDL-C and TG MR effects on disease incidence and biomarkers

The univariable MR effects of LDL-C, HDL-C, and TG were validated using independent replication data from GLGC based on clinical chemistry measurements (Supplementary Figure 2), showing strong agreement both in terms of effect direction and significance.

### Univariable MR of Apo-B and Apo-A1 concentration

The MR analyses described for lipid fractions used instruments selected from across the genome (genome-wide MR). In these analyses, horizontal pleiotropy was addressed analytically (see methods). As described by Schmidt *et al.* 2020 [4] MR analyses of protein concentration, such as Apo-B and Apo-A1, may be protected further against horizontal pleiotropy by selecting instrument from a cis window around the protein encoding gene. Here we compared results from genome-wide MR to that of cis-MR and explored agreement (Supplementary Figure 2, and Supplementary Data 8-11).

Higher Apo-B concentration was positively associated with the risk of CHD, (ischemic) stroke, CD, Alzheimer's disease, and furthermore increased CIMT, carotid plaque and SBP. Conversely, higher genetically instrumented Apo-B concentration was associated with lower HbA1c concentration as well as with pancreatic cancer risk. Aside from a directionally discordant effect on HF and arthritis, results from both

cis and genome-wide approaches agreed in both effect direction and magnitude, providing empirical support for analytical correction of horizontal pleiotropy. For HF and arthritis, we made further comparisons against the LDL-C, IDL-C and VLDL-C (the carriers Apo-B) effects, providing support for the observed genome-wide Apo-B effect where higher concentrations increased HF risk and lowered arthritis risk (Supplementary Figure 2). Due to the modest number of cis variants for Apo-A1 (2 APOA1 variants compared to 8 for APOB; Tables S10-S13) agreement between both analytical methods was limited. Instead, we focussed on the genome-wide MR results, where we expect the larger number of variant leads to better control of horizontal pleiotropy. The genome-wide MR results suggest that higher ApoA-1 concentration decreases the risk of CHD, and T2DM, decreases carotid plaque size, DBP, while increasing CRP concentrations (Supplementary Figure 2).

## Bibliography

- [1] Tina Shah et al. "Population genomics of cardiometabolic traits: design of the University College London-London School of Hygiene and Tropical Medicine-Edinburgh-Bristol (UCLEB) Consortium." In: *PloS one* 8 (8 2013), e71345. ISSN: 1932-6203. DOI: 10.1371/journal.pone.0071345. epublish.
- [2] Johannes Kettunen et al. "Genome-wide study for circulating metabolites identifies 62 loci and reveals novel systemic effects of LPA." In: *Nature communications* 7 (Mar. 2016), p. 11122. ISSN: 2041-1723. DOI: 10.1038/ncomms11122. epublish.
- [3] Cristen J Willer et al. "Discovery and refinement of loci associated with lipid levels." In: *Nature genetics* 45 (11 Nov. 2013), pp. 1274-1283. ISSN: 1546-1718. DOI: 10.1038/ng.2797.
- [4] Amand F. Schmidt et al. "Genetic drug target validation using Mendelian randomisation." In: *Nature communications* 11 (1 June 2020), p. 3255. ISSN: 2041-1723. DOI: 10.1038/s41467-020-16969-0. epublish.
